# Supplementary material for: Cks1 Is Required for Tumor Cell Proliferation but Not Sufficient to Induce Hematopoietic Malignancies
Source: PubMed Central journal article supplement (PMC3356264; doi:10.1371/journal.pone.0037433), 2012-05-18
Supplement: pone.0037433.s001.pdf [file pone.0037433.s001.pdf]

Figure S1

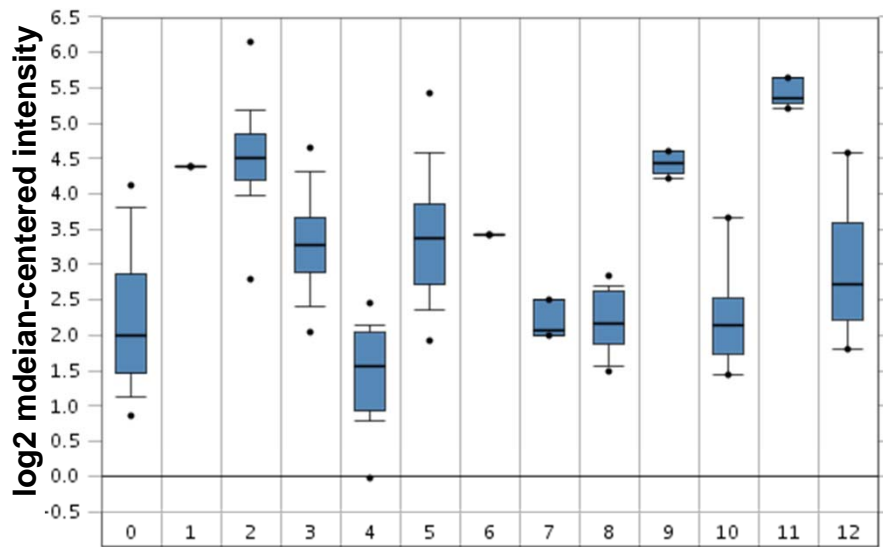

**Legend**

- |                                       |                                   |
|---------------------------------------|-----------------------------------|
| 0. No value (58)                      | 7. Follicular Lymphoma (6)        |
| 1. B-Cell Non-Hodgkin's Lymphoma (1)  | 8. Hairy Cell Leukemia (16)       |
| 2. Burkitt's Lymphoma (127)           | 9. Hodgkin's Lymphoma (4)         |
| 3. Centroblastic Lymphoma (28)        | 10. Mantle Cell Lymphoma (8)      |
| 4. Chronic Lymphocytic Leukemia (34)  | 11. Multiple Myeloma (4)          |
| 5. Diffuse Large B-Cell Lymphoma (40) | 12. Primary Effusion Lymphoma (9) |
| 6. Embryonal Rhabdomyosarcoma (1)     |                                   |
