# Supplementary material for: Cks1 Is Required for Tumor Cell Proliferation but Not Sufficient to Induce Hematopoietic Malignancies
Source: PubMed Central journal article supplement (PMC3356264; doi:10.1371/journal.pone.0037433), 2012-05-18

Figure S3

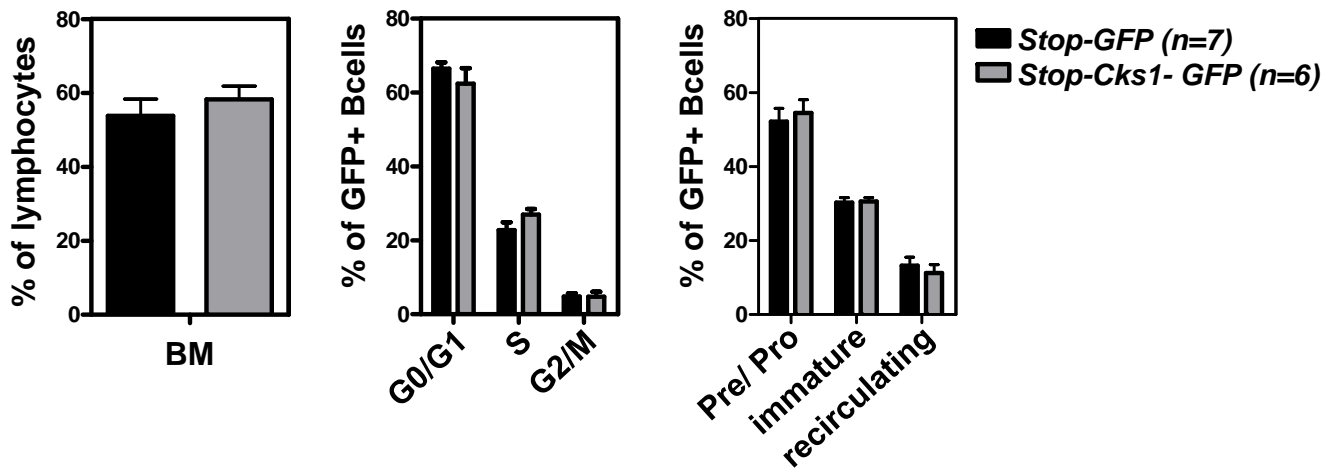

Supplement: pone.0037433.s003.pdf [file pone.0037433.s003.pdf]
